# Supplementary material for: Synthesis of highly crystalline black phosphorus thin films on GaN
Source: Royal Society of Chemistry journal article supplement (doi:10.1039/d0nr06764d), 2020-01-01
Supplement: d0nr06764d1.pdf [file d0nr06764d1.pdf]

## Supporting Information

### Synthesis of highly crystalline Black Phosphorus Thin Film on GaN

Dan Han,<sup>1</sup> Qingming Liu,<sup>4</sup> Qiang Zhang,<sup>1</sup> Jianlong Ji,<sup>1</sup> Shengbo Sang,<sup>1\*</sup> and Bingshe Xu<sup>2,3,4\*</sup>

<sup>1</sup>*MicroNano System Research Center, Key Lab of Advanced Transducers and Intelligent Control System of the Ministry of Education & College of Information Engineering, Taiyuan University of Technology, Jinzhong 030600, China.*

<sup>2</sup>*Key Laboratory of Interface Science and Engineering in Advanced Materials (Taiyuan University of Technology), Ministry of Education, Taiyuan, 030024, People's Republic of China*

<sup>3</sup>*Research Center of Advanced Materials Science and Technology, Taiyuan University of Technology, Taiyuan, 030024, People's Republic of China*

<sup>4</sup>*Institute of Atomic and Molecular Science, Shaanxi University of Science and Technology, Xi'an 710021, People's Republic of China*

\* Correspondence: [\\*sunboa-sang@tyut.edu.cn](mailto:sunboa-sang@tyut.edu.cn) [\\*xubs@tyut.edu.cn](mailto:xubs@tyut.edu.cn)

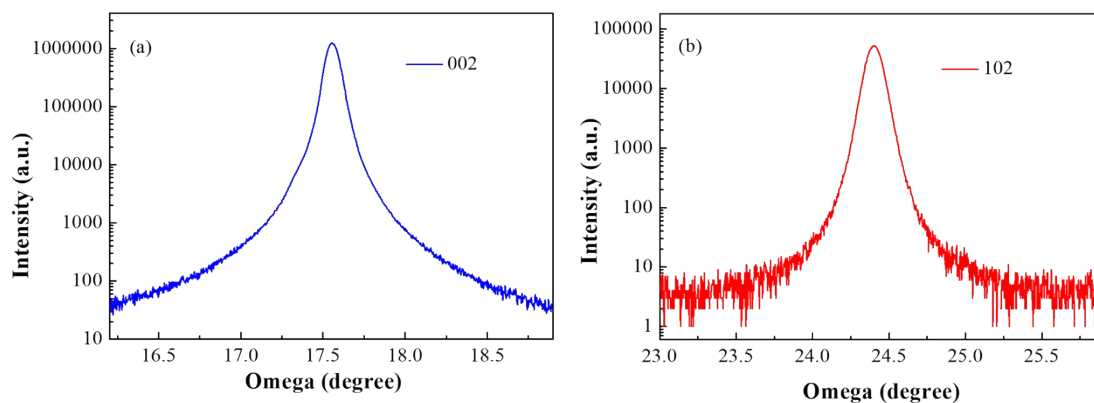

**Supplementary Figure 1** The rocking curves of (002) and (102) planes of GaN epitaxial layer.

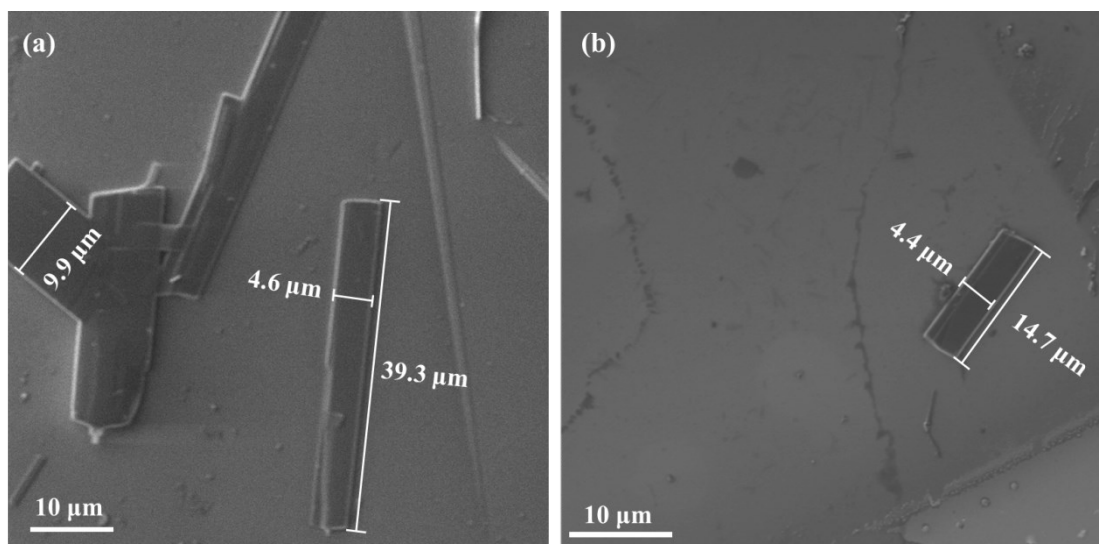

**Supplementary Figure 2** SEM images of thin-film BP with varied sizes. (a) The maximum length and width are 39.3  $\mu\text{m}$  and 9.9  $\mu\text{m}$ . (b) The thin-film BP with dimensions of 11  $\times$  81.6  $\mu\text{m}$ .

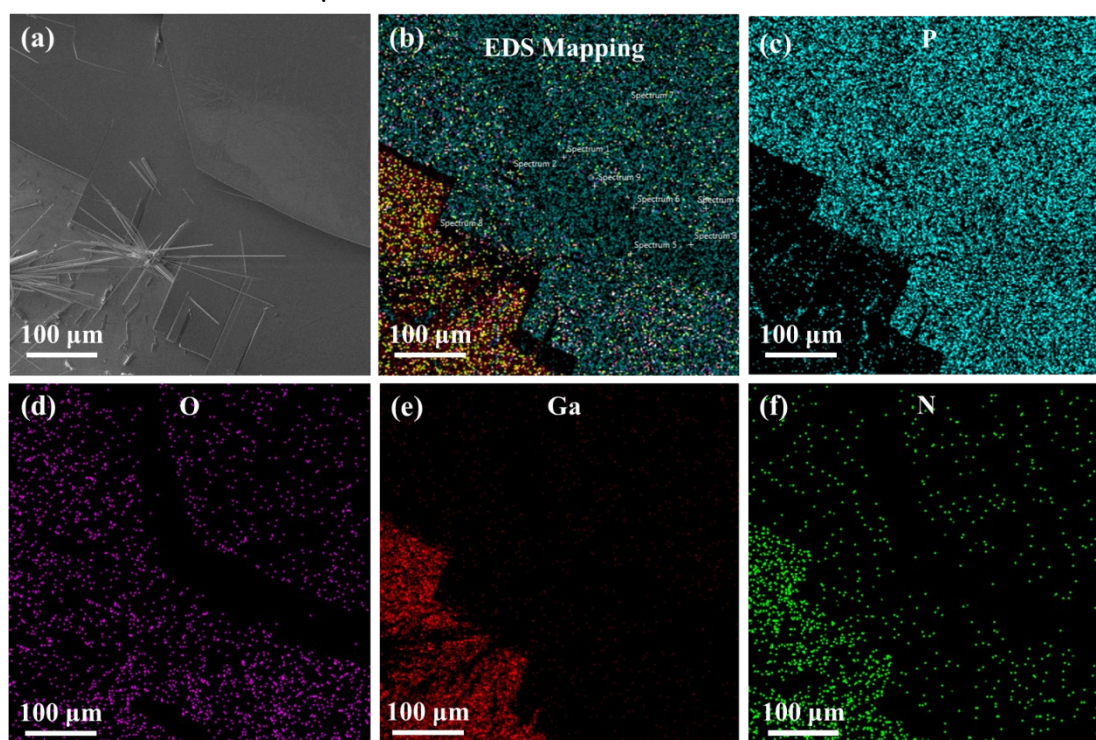

**Supplementary Figure 3** (a)-(b) SEM image and EDS mapping of large area of layered BP on the GaN, (c)-(f) P, O, Ga and N atoms EDS mapping, respectively.

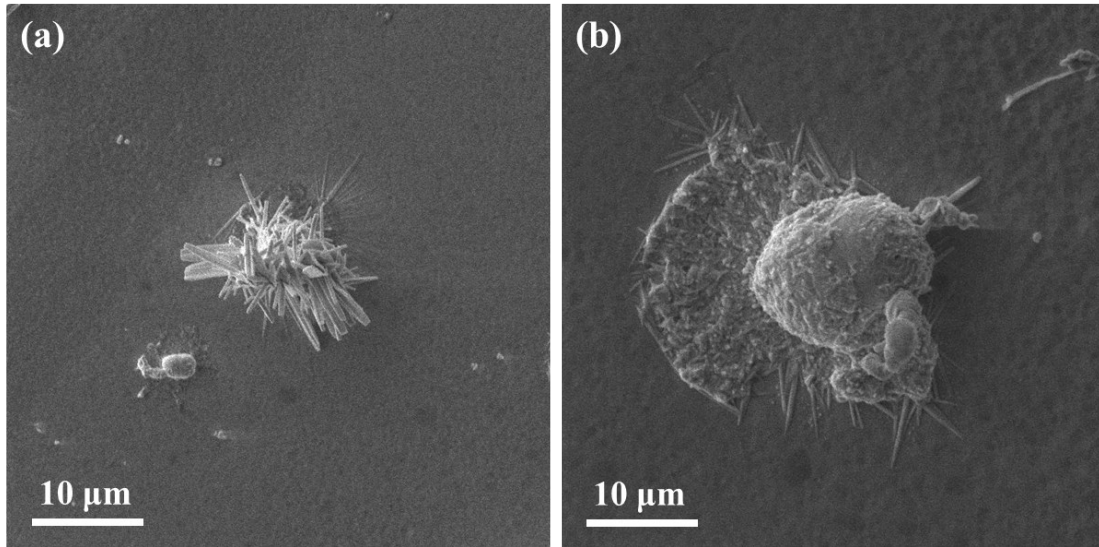

**Supplementary Figure 4** (a)-(b) SEM images of needle-like and other large area amorphous phosphorus on GaN. respectively.
